# Supplementary material
Source: PubMed Central journal article supplement (PMC3552032)
Supplement: NIHMS419111-supplement-Supp_TableS1.pdf [file NIHMS419111-supplement-Supp_TableS1.pdf]

|    | A                               | B                            | C                           | D              | E              | F                 | G                 |
|----|---------------------------------|------------------------------|-----------------------------|----------------|----------------|-------------------|-------------------|
| 1  | <b>Genotype</b>                 | <b>Number of animals (M)</b> | <b>Number of animals(F)</b> | <b>Mean(M)</b> | <b>Mean(F)</b> | <b>Maximum(M)</b> | <b>Maximum(F)</b> |
| 2  | w1118 x dilp2-Gal4              | 490                          | 416                         | 74             | 82             | 103               | 105               |
| 3  | UASmth22 x w1118                | 399                          | 362                         | 79             | 79             | 98                | 101               |
| 4  | UASmth25 x w1118                | 380                          | 396                         | 77             | 81             | 101               | 105               |
| 5  | UASmth22 x dilp2-Gal4           | 551                          | 474                         | 86             | 93             | 119               | 140               |
| 6  | UASmth25 x dilp2-Gal4           | 549                          | 516                         | 93             | 99             | 133               | 140               |
| 7  | w1118 x ok107                   | 325                          | 292                         | 62             | 74             | 99                | 103               |
| 8  | Ok107 X UASmth22                | 310                          | 319                         | 65             | 68             | 95                | 98                |
| 9  | Ok107 X UASmth25                | 311                          | 299                         | 62             | 71             | 98                | 101               |
| 10 | w1118 x UAS-mthRNAi             | 425                          | 413                         | 78             | 82             | 93                | 101               |
| 11 | UAS-mthRNAi x dilp2-GAL4        | 479                          | 483                         | 98             | 104            | 123               | 130               |
| 12 | w1118 x UAS mth618              | 166                          | 176                         | 71             | 85             | 86                | 98                |
| 13 | UAS mth618 x dilp2-GAL4         | 155                          | 182                         | 94             | 101            | 100               | 112               |
| 14 | UASBskDN x w1118                | 360                          | 371                         | 65             | 69             | 96                | 96                |
| 15 | UASBskDN; UASmth22,dilp2-Gal4   | 377                          | 381                         | 76             | 80             | 101               | 105               |
| 16 | w1118 X Foxo21                  | 341                          | 410                         | 59             | 63             | 90                | 95                |
| 17 | UASmth22,dilp2-Gal4;Foxo21      | 436                          | 486                         | 54             | 62             | 93                | 97                |
| 18 | w1118 x UAS-mth2RNAi            | 330                          | 335                         | 76             | 79             | 91                | 96                |
| 19 | UAS-mth2RNAi x dilp2-GAL4       | 371                          | 426                         | 69             | 73             | 95                | 99                |
| 20 | w1118 x UAS-Arrestin            | 369                          | 344                         | 74             | 80             | 86                | 97                |
| 21 | UAS-arrestin x dilp2-GAL4       | 451                          | 423                         | 97             | 100            | 113               | 118               |
| 22 | UASBskDN; UASmthRNAi,dilp2-Gal4 | 403                          | 334                         | 64             | 77             | 90                | 94                |
