# Supplementary material
Source: PubMed Central journal article supplement (PMC3552032)

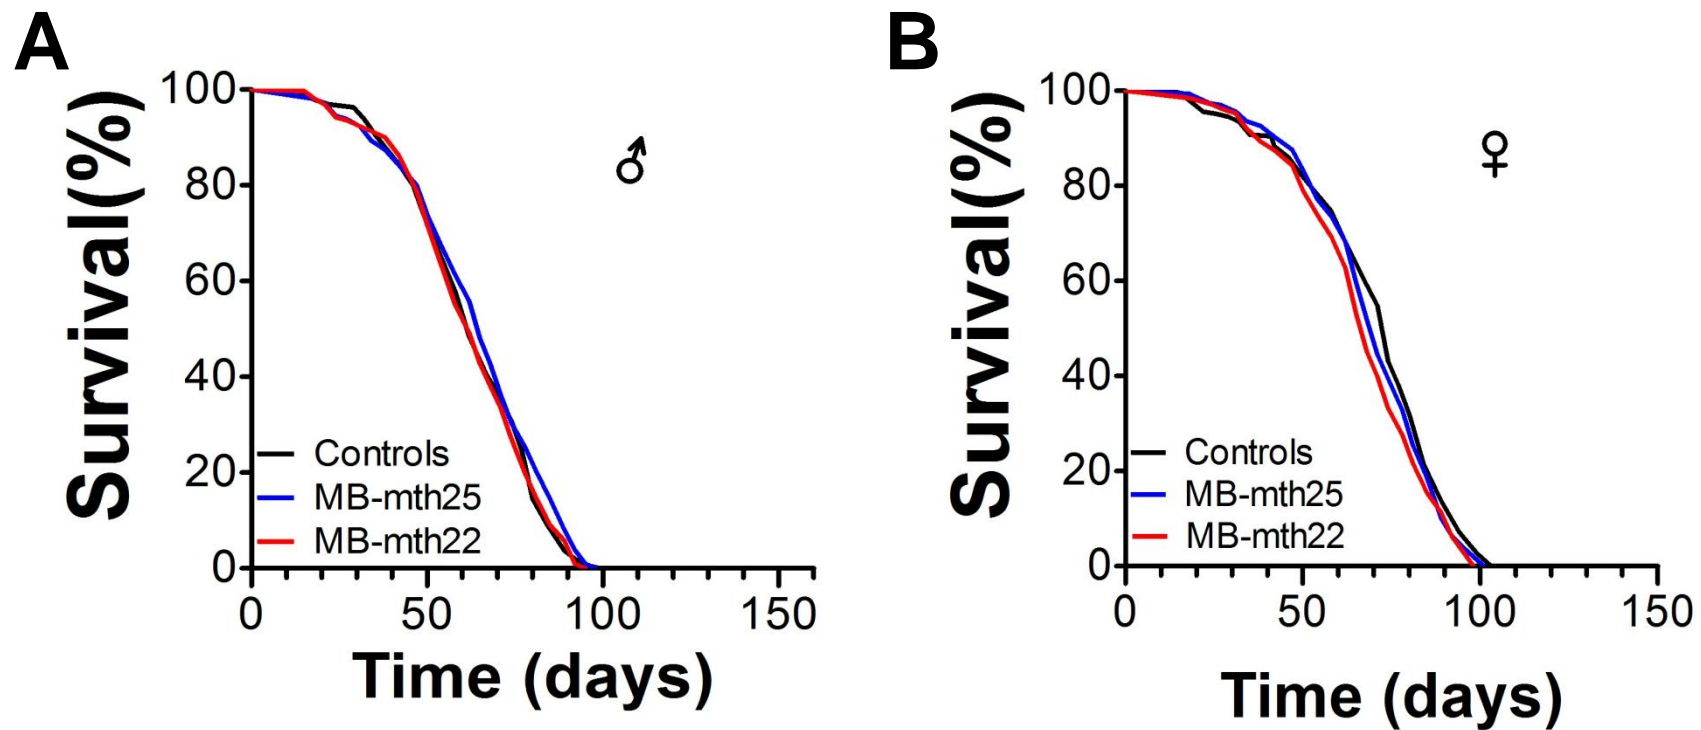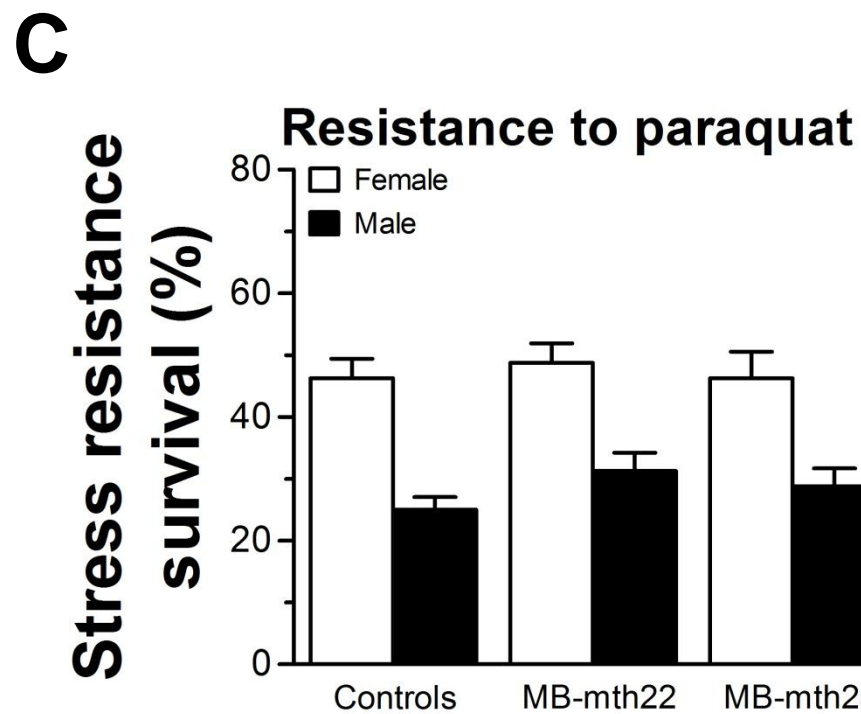

Supplement: NIHMS419111-supplement-Supp_FigureS2.pdf [file NIHMS419111-supplement-Supp_FigureS2.pdf]

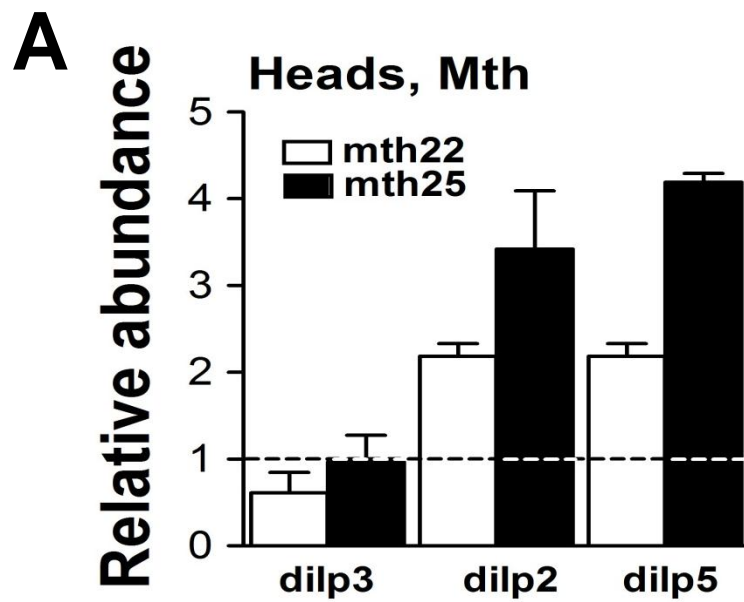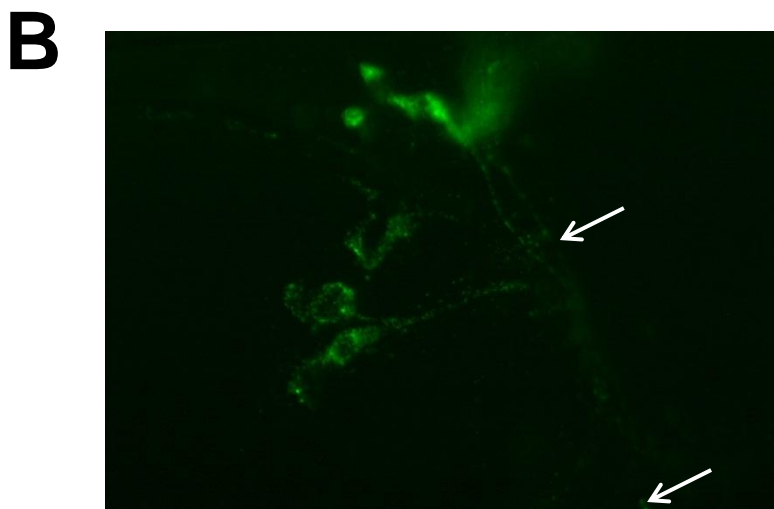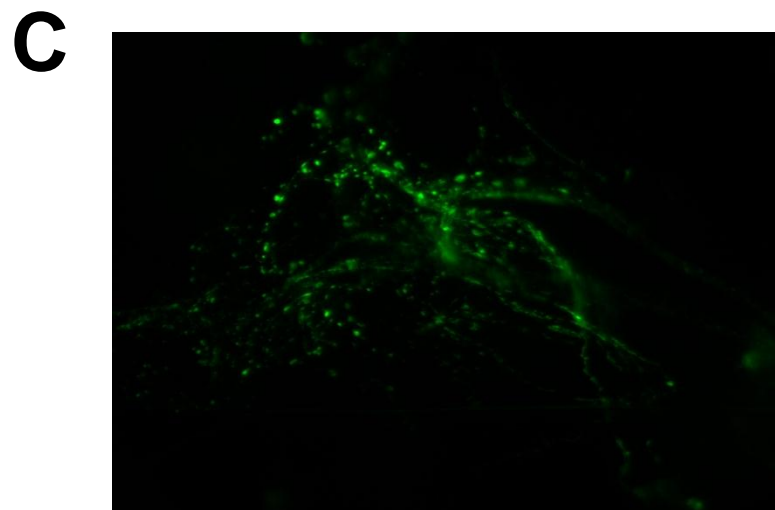

Supplement: NIHMS419111-supplement-Supp_FigureS4.pdf [file NIHMS419111-supplement-Supp_FigureS4.pdf]
